# Supplementary material for: Elucidating trends in synthesis and structural periodicity in a series of tetravalent actinide–oxo hexamers
Source: Royal Society of Chemistry journal article supplement (doi:10.1039/d4ce01042f), 2024-12-13
Supplement: d4ce01042f1.pdf [file d4ce01042f1.pdf]

# Elucidating Trends in Synthesis and Structural Periodicity in a Series of Tetravalent Actinide-oxo Hexamers

*Thomas L. McCusker,<sup>a</sup> Nicole A. Vanagas,<sup>a</sup> Robert G. Surbella III,<sup>b</sup> Jennifer E. S. Szymanowski,<sup>c</sup> Jeffery A. Bertke,<sup>a</sup> Ana Arteaga,<sup>b\*</sup> Karah E. Knope<sup>a\*</sup>*

<sup>a</sup> Department of Chemistry, Georgetown University, 37<sup>th</sup> and O Streets NW, Washington, D.C., 20057, United States

<sup>b</sup> Pacific Northwest National Laboratory, 902 Battelle Boulevard, Richland, WA 99354, United States

<sup>c</sup> Department of Civil & Environmental Engineering & Earth Sciences, University of Notre Dame, 301 Stinson-Remick, Notre Dame, Indiana 46556 USA

\*ana.artea@pnl.gov

\*kek44@georgetown.edu

## ELECTRONIC SUPPLEMENTAL INFORMATION

### Table of Contents

---

|                                                                                                                          |           |
|--------------------------------------------------------------------------------------------------------------------------|-----------|
| <b>1. CRYSTALLOGRAPHIC REFINEMENT DETAILS OF Th<sub>6</sub>, U<sub>6</sub>, Np<sub>6</sub>, AND Pu<sub>6</sub> .....</b> | <b>2</b>  |
| <b>2. STRUCTURE DESCRIPTIONS OF Th<sub>6</sub>, U<sub>6</sub>, Np<sub>6</sub>, AND Pu<sub>6</sub>.....</b>               | <b>4</b>  |
| <b>3. THERMAL ELLIPSOID PLOTS Th<sub>6</sub>, U<sub>6</sub>, Np<sub>6</sub>, and Pu<sub>6</sub>.....</b>                 | <b>5</b>  |
| <b>4. POWDER X-RAY DIFFRACTION PATTERNS OF Th<sub>6</sub>, U<sub>6</sub>, and Np<sub>6</sub>.....</b>                    | <b>7</b>  |
| <b>5. RAMAN SPECTRA OF Th<sub>6</sub>, U<sub>6</sub>, Np<sub>6</sub> AND Pu<sub>6</sub>.....</b>                         | <b>11</b> |
| <b>6. REFERENCES.....</b>                                                                                                | <b>13</b> |

---

## 1. CRYSTALLOGRAPHIC REFINEMENT DETAILS OF Th<sub>6</sub>, U<sub>6</sub>, Np<sub>6</sub>, and Pu<sub>6</sub>

### Th<sub>6</sub>: [Th<sub>6</sub>O<sub>4</sub>(OH)<sub>4</sub>(Bz)<sub>12</sub>(H<sub>2</sub>O)<sub>6</sub>]

A structural model consisting of one half of the hexamer per asymmetric unit was developed. There is 50/50 substitutional disorder of OH<sup>-</sup>/O<sup>2-</sup> at the bridging oxygen sites within the cluster. Two of the benzoate groups are disordered over two orientations. The phenyl rings were constrained to be perfect hexagons. The like O-C and C-C distances were restrained to be similar (esd 0.01 Å). The disordered sites are fixed to be 50% occupancy. The other two benzoate groups are disordered across symmetry sites. The phenyl rings were constrained to be perfect hexagons. The like Th-O, O-C and C-C distances were restrained to be similar (esd 0.01). Rigid-bond restraints were imposed on displacement parameters and similar displacement amplitudes (esd 0.01) were imposed on disordered sites overlapping by less than the sum of van der Waals radii.

Several reflections were omitted from the final refinement because they were partially obscured by the shadow of the beam stop. The hydrogen atoms for water and hydroxyl groups could not be located in the difference map and thus were left off of the model. Remaining H atoms were included as riding idealized contributors. H atom U's were assigned as 1.2 times carrier U.

### U<sub>6</sub>: [U<sub>6</sub>O<sub>4</sub>(OH)<sub>4</sub>(Bz)<sub>12</sub>(H<sub>2</sub>O)<sub>4</sub>]

A structural model consisting of two halves of the target U<sub>6</sub> clusters and several water and ethanol solvent molecules per asymmetric unit was developed. There is substitutional disorder of all of the cluster O<sup>2-</sup>/OH<sup>-</sup> groups. One benzoate ligand is disordered over two orientations. The like O-C and C-C distances were restrained to be similar (esd 0.01 Å). One lattice water molecule is disordered over two positions. One solvent site is substitutionally occupied by two orientations of ethanol and one water molecule. The like O-C and C-C distances were restrained to be similar (esd 0.01 Å). The cluster hydroxyl and lattice water H atoms could not be located in the difference map and thus were left off of the model. Ethanol hydroxyl H atom positions, R-OH, were optimized by rotation about R-O bonds with idealized O-H and R--H distances. Remaining H atoms were included as riding idealized contributors. Hydroxyl H atom U's were assigned as 1.5 times U of the carrier atom; remaining H atom U's were assigned as 1.2 times carrier U. Several reflections were omitted from the final refinement because they were partially obscured by the edge of the detector.

### Np<sub>6</sub>: [Np<sub>6</sub>O<sub>4</sub>(OH)<sub>4</sub>(Bz)<sub>12</sub>(H<sub>2</sub>O)<sub>4</sub>]

Refinement details for this structure are not reported as only a preliminary refinement for Np<sub>6</sub> was obtained.

**Pu<sub>6</sub>: [Pu<sub>6</sub>O<sub>4</sub>(OH)<sub>4</sub>(Bz)<sub>12</sub>(H<sub>2</sub>O)<sub>4</sub>]**

A structural model consisting of the host plus two disordered ethanol and three disordered water solvate molecules was developed; however, positions for the idealized solvate molecules were poorly determined. Since positions for the solvate molecules were poorly determined, a second structural model was refined with contributions from the solvate molecules removed from the diffraction data using the bypass procedure in PLATON (Spek, 2015).<sup>1</sup> No positions for the host network differed by more than two su's between these two refined models. The electron count from the SQUEEZE model converged in good agreement with the number of solvate molecules predicted by the complete refinement. The SQUEEZE data are reported here.

There is substitutional disorder of all of the cluster O<sup>2-</sup>/OH<sup>-</sup> groups. Two benzoate ligands are disordered over two orientations. The like O-C and C-C distances were restrained to be similar (esd 0.01 Å). Similar displacement amplitudes (esd 0.01) were imposed on disordered sites overlapping by less than the sum of van der Waals radii. H atoms were included as riding idealized contributors. H atom U's were assigned as 1.2 times carrier U.

**Table S1:** Crystallographic refinement details for **Th<sub>6</sub>**, **U<sub>6</sub>**, **Np<sub>6</sub>**, and **Pu<sub>6</sub>**.

| Structure              | Th <sub>6</sub>                                                 | U <sub>6</sub>                                                       | Np <sub>6</sub> *                                               | Pu <sub>6</sub>                                                 |
|------------------------|-----------------------------------------------------------------|----------------------------------------------------------------------|-----------------------------------------------------------------|-----------------------------------------------------------------|
| Formula                | Th <sub>6</sub> C <sub>84</sub> H <sub>60</sub> O <sub>38</sub> | U <sub>6</sub> C <sub>87.28</sub> H <sub>69.83</sub> O <sub>40</sub> | Np <sub>6</sub> C <sub>84</sub> H <sub>60</sub> O <sub>36</sub> | Pu <sub>6</sub> C <sub>84</sub> H <sub>60</sub> O <sub>36</sub> |
| MW (g/mol)             | 3069.56                                                         | 3186.75                                                              | 3097.32                                                         | 3097.32                                                         |
| Temperature (K)        | 100(2)                                                          | 100(2)                                                               | 100(2)                                                          | 100(2)                                                          |
| Crystal System         | Monoclinic                                                      | Monoclinic                                                           | Monoclinic                                                      | Monoclinic                                                      |
| Space Group            | C2/m                                                            | P2 <sub>1</sub> /n                                                   | P2 <sub>1</sub> /n                                              | P2 <sub>1</sub> /n                                              |
| λ (Å)                  | 0.71073                                                         | 0.71073                                                              | 0.71073                                                         | 0.71073                                                         |
| a (Å)                  | 24.309(3)                                                       | 15.8168(1)                                                           | 15.789(4)                                                       | 15.805(7)                                                       |
| b (Å)                  | 17.216(2)                                                       | 24.7055(1)                                                           | 24.949(6)                                                       | 24.801(1)                                                       |
| c (Å)                  | 17.1830(1)                                                      | 23.9238(1)                                                           | 23.814(6)                                                       | 23.813(1)                                                       |
| α (°)                  | 90                                                              | 90                                                                   | 90                                                              | 90                                                              |
| β (°)                  | 134.903(4)                                                      | 95.234(2)                                                            | 95.382(7)                                                       | 95.628(1)                                                       |
| γ (°)                  | 90                                                              | 90                                                                   | 90                                                              | 90                                                              |
| V (Å <sup>3</sup> )    | 5093.5(1)                                                       | 9309.5(9)                                                            | 9340(4)                                                         | 9289(9)                                                         |
| Z                      | 2                                                               | 4                                                                    | 4                                                               | 4                                                               |
| ρ (g/cm <sup>3</sup> ) | 2.001                                                           | 2.274                                                                | 2.159                                                           | 2.215                                                           |
| μ (mm <sup>-1</sup> )  | 8.805                                                           | 10.490                                                               | 6.694                                                           | 4.279                                                           |
| R <sub>1</sub>         | 0.0352                                                          | 0.0358                                                               | 0.2178                                                          | 0.0554                                                          |
| wR <sub>2</sub>        | 0.0996                                                          | 0.0643                                                               | 0.5246                                                          | 0.1426                                                          |
| GOF                    | 1.241                                                           | 1.110                                                                | 1.949                                                           | 1.074                                                           |
| CCDC                   | 2387949                                                         | 2387950                                                              | NA                                                              | 2387951                                                         |

\*The refinement of **Np<sub>6</sub>** is only preliminary because of poor crystal quality.

## 2. STRUCTURE DESCRIPTIONS OF **Th**<sub>6</sub>, **U**<sub>6</sub>, **Np**<sub>6</sub>, and **Pu**<sub>6</sub>.

The compound **Th**<sub>6</sub> crystallizes in the space group C2/m, Table S1. The asymmetric unit contains three unique thorium centers, four benzoate ligands, two  $\mu_3$ -oxygen atoms, and three bound aqua ligands. The thorium metal centers are bound to nine oxygen atoms and adopt a monocapped square antiprism coordination geometry with a local C<sub>4v</sub> symmetry, Fig. 1. The cluster core is decorated with six aqua and twelve benzoate ligands. All benzoate ligands bridge adjacent thorium atoms ( $\kappa^2$ ). Solvent molecules were not located during structure refinement. The experimental powder diffraction pattern of the bulk sample is consistent with the calculated diffraction pattern obtained from the single-crystal data, suggesting that the crystal used for structure determination is representative of the bulk.

A preliminary structure refinement (Table S1) was obtained for **Np**<sub>6</sub> which crystallizes in the space group P2<sub>1</sub>/n. However, only the cluster core (Fig. S3) could be resolved due to weak crystal diffraction and poor data quality. Nonetheless, we believe that **Np**<sub>6</sub> is isomorphous with **U**<sub>6</sub> and **Pu**<sub>6</sub> based on unit cell parameters and powder X-ray diffraction data, which showed agreement between the experimental powder pattern collected for **Np**<sub>6</sub> and the calculated patterns of **U**<sub>6</sub> and **Pu**<sub>6</sub> (Fig. S8). Attempts were made to grow high-quality crystals through dissolution of the bulk in ethanol followed by recrystallization through slow evaporation, however this did not result in higher quality crystals.

Compounds **U**<sub>6</sub> and **Pu**<sub>6</sub> crystallize in the space group P2<sub>1</sub>/n. The asymmetric units contain six unique U/Pu metal centers (three from each of the two crystallographically unique clusters in the unit cell), eight  $\mu_3$ -oxygens, twelve benzoate ligands, four bound aqua ligands, two unbound ethanol molecules, and two unbound water molecules (one water molecule is disordered across two parts). These solvent molecules could not be reasonably modeled for **Pu**<sub>6</sub>. Therefore, the SQUEEZE function was applied *via* PLATON.<sup>1</sup> Four of the uranium/plutonium metal centers are 9-coordinate and adopt a distorted monocapped square antiprism coordination geometry, with local C<sub>1</sub> symmetry (Fig 2). The other two uranium metal centers are 8-coordinate and feature a square antiprism coordination geometry with D<sub>4d</sub> local symmetry (Fig 2). The 9-coordinate uranium centers are bound to four  $\mu_3$ -oxygens, one aqua molecule, and four oxygens from three benzoate ligands. The 8-coordinate metal centers are coordinated by four  $\mu_3$ -oxygens and four oxygens from four benzoate ligands. The **U**<sub>6</sub>/**Pu**<sub>6</sub> core is decorated with twelve benzoate and four aqua ligands. Eight benzoate ligands bridge adjacent uranium atoms ( $\kappa^2$ ) while the remainder coordinate to a single uranium atom ( $\kappa^1$ ).

### 3. THERMAL ELLIPSOID PLOTS $\text{Th}_6$ , $\text{U}_6$ , $\text{Np}_6$ , and $\text{Pu}_6$ .

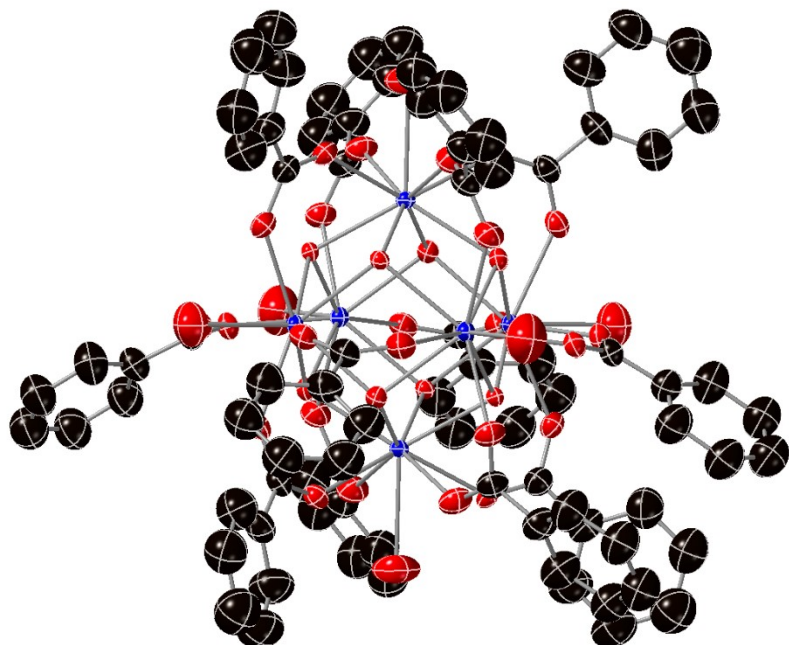

**Figure S1.** Thermal ellipsoid plot for  $\text{Th}_6$ . Ellipsoids are shown at 50% probability. Disorder and hydrogens have been omitted for clarity. Th atoms are depicted in blue, oxygen atoms are red, carbon atoms are shown in black, and hydrogen atoms are omitted for clarity.

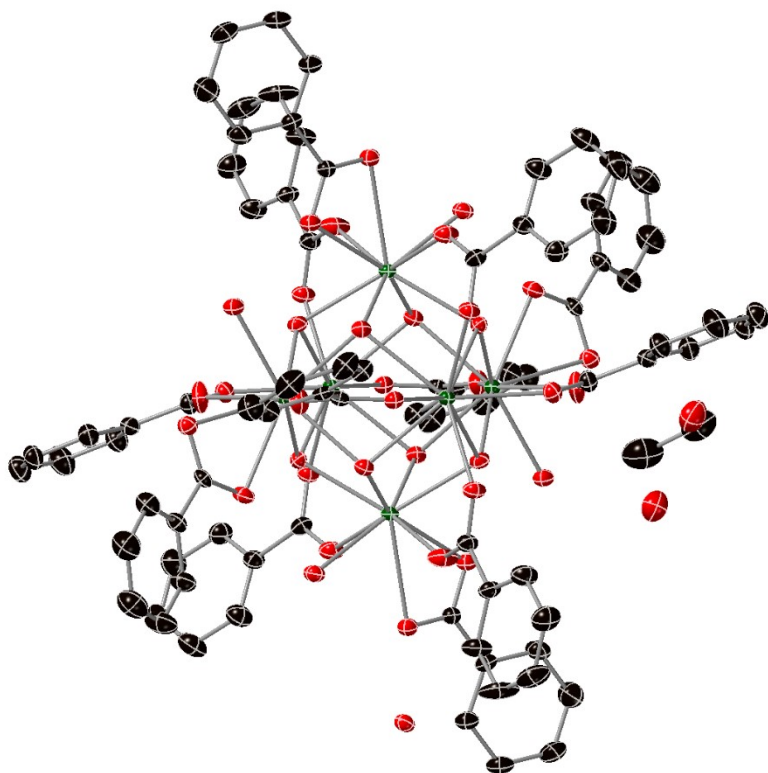

**Figure S2.** Thermal ellipsoid plot for  $U_6$ . Ellipsoids are generated at 50% probability. Disorder and hydrogens have been omitted for clarity. Water and ethanol are present in the crystal structure. These lattice solvent molecules are partially occupied according to the formula provided in the previous section. U atoms are depicted in green, oxygen atoms are red, carbon atoms are shown in black, and hydrogen atoms are omitted for clarity.

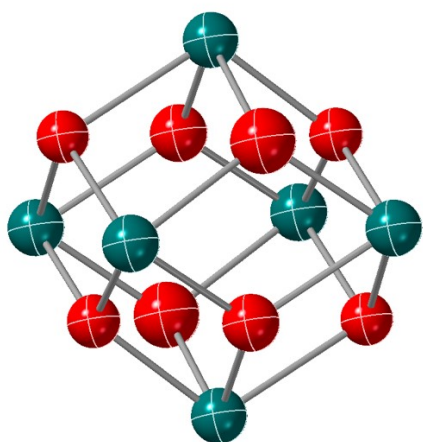

**Figure S3.** Cluster core of  $Np_6$  with neptunium atoms depicted in blue and oxygen atoms are shown in red. Np atoms are depicted in light blue and oxygen atoms are red.

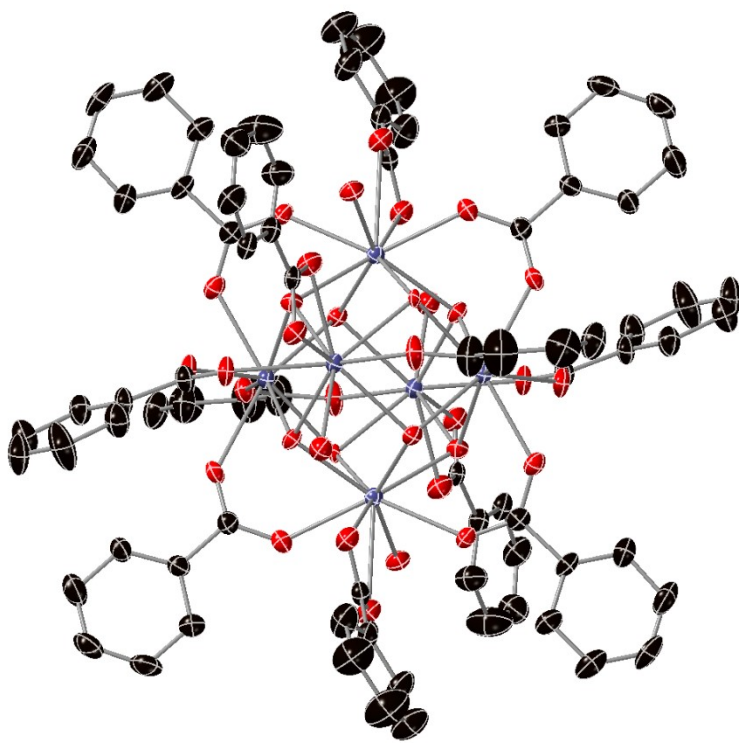

**Figure S4.** Thermal ellipsoid plot for **Pu<sub>6</sub>**. Ellipsoids are generated at 50% probability. Disorder and hydrogens have been omitted for clarity. Residual electron density in the outer coordination sphere could not be resolved and was therefore squeezed from the structure. Pu atoms are depicted in blue, oxygen atoms are red, carbon atoms are shown in black, and hydrogen atoms are omitted for clarity.

#### **4. POWDER X-RAY DIFFRACTION PATTERNS OF Th<sub>6</sub>, U<sub>6</sub>, and Np<sub>6</sub>.**

Powder X-Ray diffraction (PXRD) patterns were collected for **Th<sub>6</sub>** and **U<sub>6</sub>** in order to identify the presence of impurities prior to bulk sample measurements. For both compounds, peaks present in the experimental diffraction pattern are accounted for by the pattern calculated from the single crystal data. These results indicate that the single crystals used to collect single crystal X-ray diffraction (SCXRD) are representative of the bulk phase.

The identity of **Np<sub>6</sub>** was confirmed by comparing an experimental PXRD pattern to the simulated pattern generated from the crystal structure of **U<sub>6</sub>** shown in Figure S8. These patterns are in good agreement despite obvious preferred orientation and the poor crystal quality of **Np<sub>6</sub>**.

Also shown is the experimental PXRD from the powder obtained when attempting to synthesize  $\text{Th}_6$  in the same manner as  $\text{U}_6$ . This pattern is in good agreement with the pattern simulated from the thorium-benzoate coordination polymer published by Loiseau et al.<sup>2</sup>

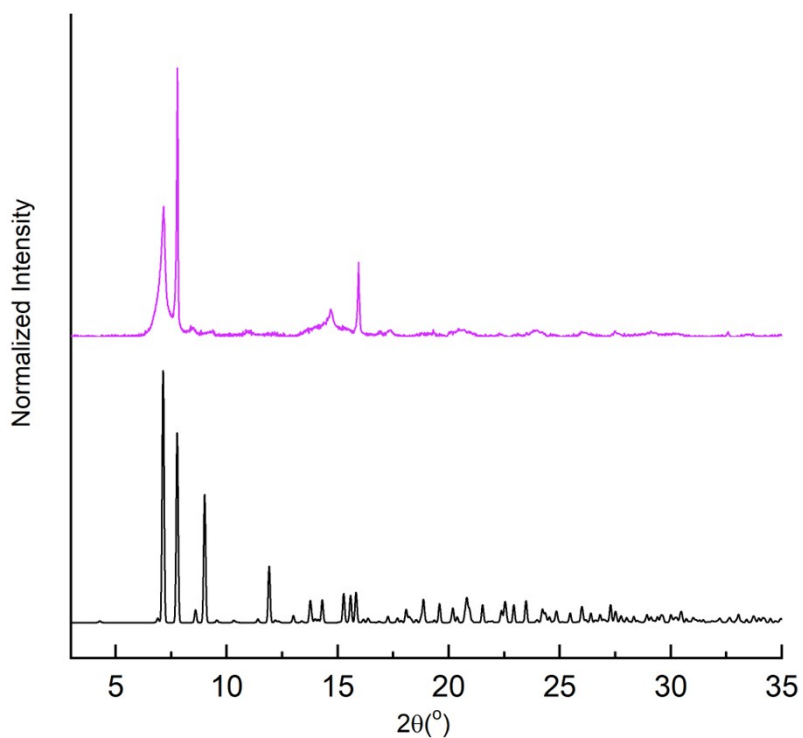

**Figure S5.** Powder X-ray diffraction for the previously reported thorium chain (pink) compared to the calculated diffraction pattern generated from the cif (black).



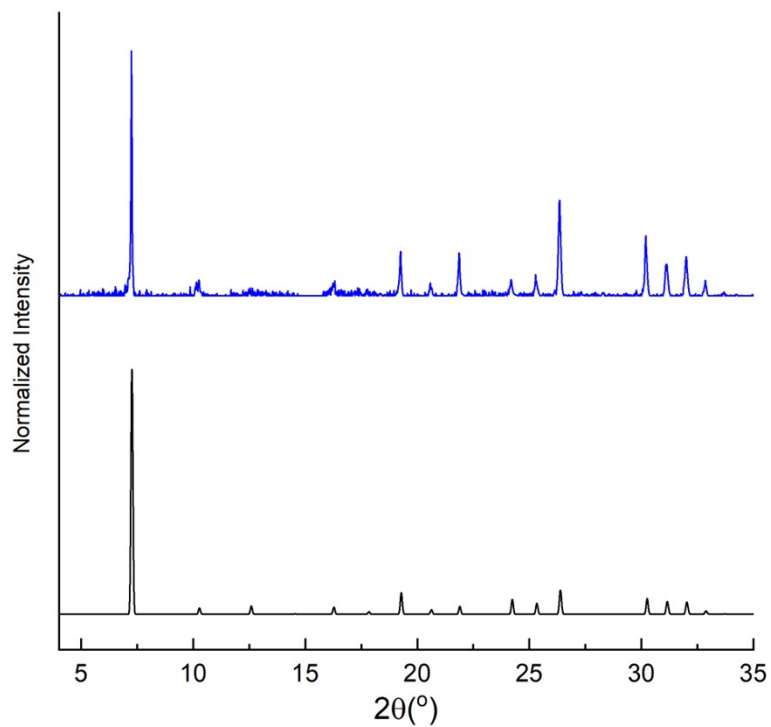

**Figure S6.** Powder X-ray diffraction for **Th<sub>6</sub>** (blue) compared to the calculated diffraction pattern generated from the cif (black).

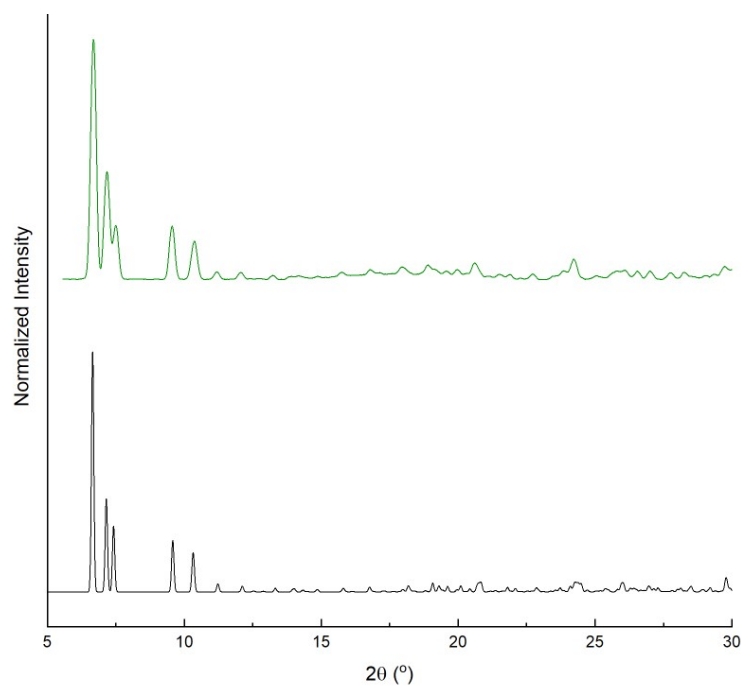

**Figure S7.** Powder X-ray diffraction for **U<sub>6</sub>** (green) compared to the calculated diffraction pattern generated from the cif of **U<sub>6</sub>** (black).

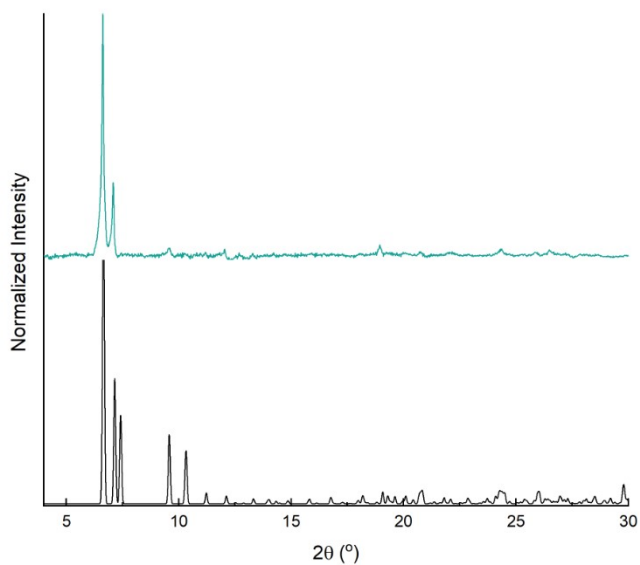

**Figure S8.** Powder X-ray diffraction for  $\text{Np}_6$  (light blue) compared to the calculated diffraction pattern generated from the cif of  $\text{U}_6$  (black). Agreement of the two patterns is consistent with formation of a Np-based hexamer.

## 5. RAMAN SPECTRA OF Th<sub>6</sub>, U<sub>6</sub>, Np<sub>6</sub> and Pu<sub>6</sub>.

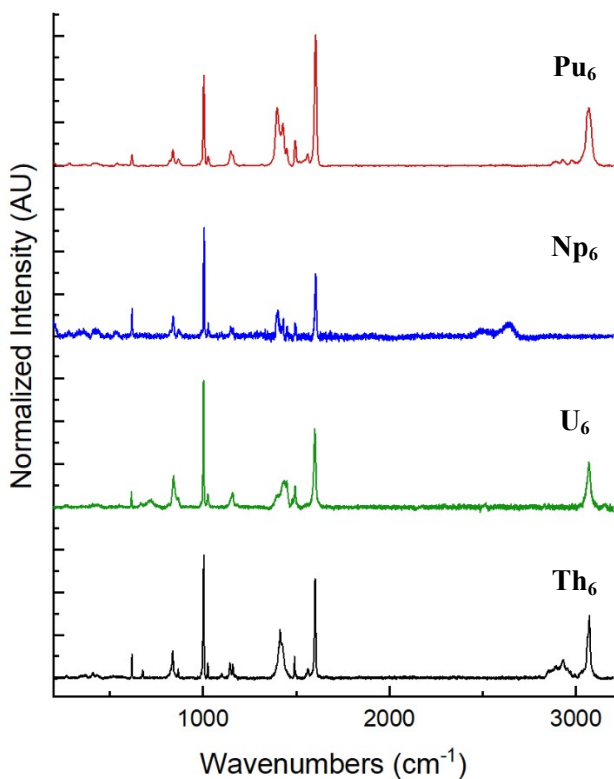

**Figure S9.** Raman spectra of Th<sub>6</sub> (black), U<sub>6</sub> (green), Np<sub>6</sub> (blue), and Pu<sub>6</sub> (red)

**Table S2:** Tentative assignment of Raman modes for Th<sub>6</sub>, U<sub>6</sub>, Np<sub>6</sub>, and Pu<sub>6</sub>.

| Tentative Assignment                              | Th <sub>6</sub> | U <sub>6</sub> | Np <sub>6</sub> | Pu <sub>6</sub> |
|---------------------------------------------------|-----------------|----------------|-----------------|-----------------|
|                                                   | 619             | 616            | 620             | 619             |
| μ <sub>3</sub> -OH bend <sup>3</sup>              | 676             | 722            | N/A             | N/A             |
| COO <sup>-</sup> in-plane scissoring <sup>4</sup> | 837             | 842            | 838             | 837             |
| Ring breathing in-phase <sup>4</sup>              | 1003            | 1003           | 1006            | 1003            |
|                                                   | 1025            | 1026           | 1028            | 1028            |
| C-C symmetric ring breathing <sup>5</sup>         | 1145            | 1158           | 1150            | 1148            |
|                                                   | 1413            | 1414           | 1399            | 1397            |

|                                                  |      |      |      |      |
|--------------------------------------------------|------|------|------|------|
|                                                  | 1491 | 1493 | 1493 | 1493 |
| Aromatic C-C stretching (symmetric) <sup>5</sup> | 1560 | N/A  | N/A  | 1562 |
| C-C stretch of benzene ring <sup>4</sup>         | 1601 | 1600 | 1604 | 1604 |
| sp <sup>2</sup> C-H stretch <sup>6</sup>         | 2928 | N/A  | N/A  | 2829 |
| Aromatic C-H stretching <sup>5</sup>             | 3072 | 3072 | N/A  | 3069 |

**Table S3:** IR stretches for **Th<sub>6</sub>**, **U<sub>6</sub>**, **Np<sub>6</sub>**, and **Pu<sub>6</sub>** with assignments of select stretches.

| Tentative Assignment                                                    | Th <sub>6</sub> | U <sub>6</sub> | Np <sub>6</sub> | Pu <sub>6</sub> |
|-------------------------------------------------------------------------|-----------------|----------------|-----------------|-----------------|
| =C-H out of plane bending <sup>6</sup>                                  | 720             | 705            | 713             | 712             |
| =C-H out of plane bending <sup>6</sup>                                  | 855             | 863            | 867             | 865             |
| CO <sub>2</sub> bend <sup>3</sup>                                       | 943             | 932            | 937             | 934             |
|                                                                         | 1025            | 1025           | 1025            | 1026            |
|                                                                         | 1097            | 1070           | 1071            | 1071            |
|                                                                         | 1160            | 1175           | 1177            | 1177            |
|                                                                         | 1388            | 1396           | 1394            | 1393            |
| C=O stretch <sup>6</sup>                                                | 1551            | 1541           | 1539            | 1532            |
| C=O stretch <sup>6</sup>                                                | 1597            | 1597           | 1596            | 1595            |
| H <sub>2</sub> O bend + CO <sub>2</sub> asymmetric stretch <sup>3</sup> | 1661            | 1677           | 1684            | 1697            |

|                                                 |      |      |      |      |
|-------------------------------------------------|------|------|------|------|
| sp <sup>2</sup> C-H stretch <sup>6</sup>        | 2928 | N/A  | 3051 | N/A  |
| sp <sup>2</sup> C-H stretch <sup>6</sup>        | 3061 | 3064 | 3055 | 3063 |
| H <sub>2</sub> O symmetric stretch <sup>3</sup> | 3633 | N/A  | 3629 | 3616 |

## 6. REFERENCES

- 1 A. L. Spek, *Acta Crystallogr C Struct Chem*, 2015, **71**, 9–18.
- 2 C. Falaise, C. Volkringer and T. Loiseau, *Inorg Chem Commun*, 2014, **39**, 26–30.
- 3 M. Vasiliu, K. E. Knope, L. Soderholm and D. A. Dixon, *J Phys Chem A*, 2012, **116**, 6917–6926.
- 4 W. Xi and A. J. Haes, *J Chem Phys*, 2020, **153**, 184707.
- 5 A. M. Hastings, D. Ray, W. Jeong, L. Gagliardi, O. K. Farha and A. E. Hixon, *Supporting Information for: Advancement of Actinide Metal-Organic Framework Chemistry via Synthesis of Pu-UiO-66*, .
- 6 M. Kumar, R. Bala, V. S. Gondil, S. K. Pandey, S. Chhibber, D. V. S. Jain, R. K. Sharma and N. Wangoo, *J Mater Sci*, 2017, **52**, 8568–8575.
